# Supplementary material for: Identification and Localization of the Cyclic Nucleotide Phosphodiesterase 10A in Bovine Testis and Mature Spermatozoa
Source: PubMed Central journal article supplement (PMC4993467; doi:10.1371/journal.pone.0161035), 2016-08-22
Supplement: pone.0161035.s001.pdf [file pone.0161035.s001.pdf]

|             |                                                                                                                                                 |              |
|-------------|-------------------------------------------------------------------------------------------------------------------------------------------------|--------------|
| clone<br>X3 | AAGTGCTTCCGGTCCATCCGCTCTGTTTCGCCGTGGCCAGGGGTGGACGTGGACGTGAGG<br>-----CCGCTCTGTTTCGCCGTGGCCAGGGGTGGACGTGGACGTGAGG<br>*****                       | 60<br>43     |
| clone<br>X3 | CCTCACAAGGCCACCCGCAACTCCTCGGAGGTCCC TGACCGTCTCTGCCGTCC TTGTTT<br>CCTCACAAGGCCACCCGCAACTCCTCGGAGGTCCC TGACCGTCTCTGCCGTCC TTGTTT<br>*****         | 120<br>103   |
| clone<br>X3 | CCCTCAACTGCAGTCTTCCGAATCCTTGAAAAGTTC TCAGGACTCCAGTCC TTTCTTGCT<br>CCCTCAACTGCAGTCTTCCGAATCCTTGAAAAGTTC TCAGGACTCCAGTCC TTTCTTGCT<br>*****       | 180<br>163   |
| clone<br>X3 | TTTCAGTTGGCCATTTTGACCAC TTCAATTT CAGAACTTAAATTCGGATAATTCCTCCTA<br>TTTCAGTTGGCCATTTTGACCAC TTCAATTT CAGAACTTAAATTCGGATAATTCCTCCTA<br>*****       | 240<br>223   |
| clone<br>X3 | ATCGTTCCAATGCGCTCGAGGTCTCTGCACGAACTGCAGCTCTCATCCTCCACCGACTCA<br>ATCGTTCCAATGCGCTCGAGGTCTCTGCACGAACTGCAGCTCTCATCCTCCACCGACTCA<br>*****           | 300<br>283   |
| clone<br>X3 | GGCAGCGTCTTTCCCTTTCAC TGAACAAAAGCCTGTTTCCGCGGCTTCCAAC TCTGCGCAG<br>GGCAGCGTCTTTCCCTTTCAC TGAACAAAAGCCTGTTTCCGCGGCTTCCAAC TCTGCGCAG<br>*****     | 360<br>343   |
| clone<br>X3 | TGCCACACGCGCTGCCACCCACCCGTGCC TTCC TTTCTGTCAAGTCGACTCCC TCTT CACA<br>TGCCACACGCGCTGCCACCCACCCGTGCC TTCC TTTCTGTCAAGTCGACTCCC TCTT CACA<br>***** | 420<br>403   |
| clone<br>X3 | TGGCTCCCGCAGAAGCCTGTCAGTCAAGGAGGACCAGGAAGCCAGATCCCAGCAACCCCA<br>TGGCTCCCGCAGAAGCCTGTCAGTCAAGGAGGACCAGGAAGCCAGATCCCAGCAACCCCA<br>*****           | 480<br>463   |
| clone<br>X3 | CGTCTCACACACTCCCGCTAAACACCACACAGAAAAC TTCAGGAAATCCAGCTGCC TCCC<br>CGTCTCACACACTCCCGCTAAACACCACACAGAAAAC TTCAGGAAATCCAGCTGCC TCCC<br>*****       | 540<br>523   |
| clone<br>X3 | TTTCACACTGAAGAGCGGGAGCAGAGGACCCGCTTTGCTGACCC TGAGAAGCAGGACAGA<br>TTTCACACTGAAGAGCGGGAGCAGAGGACCCGCTTTGCTGACCC TGAGAAGCAGGACAGA<br>*****         | 600<br>583   |
| clone<br>X3 | CCCCCAGGAGCAGATGAGCCATGAGCCAGCGGAAGGCGGCTGGACGCTGCGATGCC TCC<br>CCCCCAGGAGCAGATGAGCCATGAGCCAGCGGAAGGCGGCTGGACGCTGCGATGCC TCC<br>*****           | 660<br>643   |
| clone<br>X3 | AGATTTGACAGATGAAAAAGTGAAGGCC TATCTTTCTCTCCACCC TCAGGTTTTAGATGA<br>AGATTTGACAGATGAAAAAGTGAAGGCC TATCTTTCTCTCCACCC TCAGGTTTTAGATGA<br>*****       | 720<br>703   |
| clone<br>X3 | ATTTGTGTCTGAAAGCGTTAGTGCAGAGACTGTAGAAAAATGGCTGAAGCGGAAAAACAA<br>ATTTGTGTCTGAAAGCGTTAGTGCAGAGACTGTAGAAAAATGGCTGAAGCGGAAAAACAA<br>*****           | 780<br>763   |
| clone<br>X3 | GAAGTCAGAAGATGAATCAGCTCC TAAGGAAGTCAGCAGGTATCAAGATACAAATATGCA<br>GAAGTCAGAAGATGAATCAGCTCC TAAGGAAGTCAGCAGGTATCAAGATACAAATATGCA<br>*****         | 840<br>823   |
| clone<br>X3 | AGGAGTTGTGTATGAACTAAATAGCTATATAGAACAGCGGTTGGATACAGGAGGAGACAA<br>AGGAGTTGTGTATGAACTAAATAGCTATATAGAACAGCGGTTGGATACAGGAGGAGACAA<br>*****           | 900<br>883   |
| clone<br>X3 | CCAGCTACTCCTCTATGAACTGAGCAGCATCATCAAAATCGCCACAAAAGCTGACGGATT<br>CCAGCTACTCCTCTATGAACTGAGCAGCATCATCAAAATCGCCACAAAAGCTGACGGATT<br>*****           | 960<br>943   |
| clone<br>X3 | TGCACTGTATTTCC TTGGAGAGTGAATAACAGCCTTTGTGTGTTTATCCC GCCTGGAAT<br>TGCACTGTATTTCC TTGGAGAGTGAATAACAGCCTTTGTGTGTTTATCCC GCCTGGAAT<br>*****         | 1020<br>1003 |
