# Supplementary material for: Identification and Localization of the Cyclic Nucleotide Phosphodiesterase 10A in Bovine Testis and Mature Spermatozoa
Source: PubMed Central journal article supplement (PMC4993467; doi:10.1371/journal.pone.0161035), 2016-08-22
Supplement: pone.0161035.s002.pdf [file pone.0161035.s002.pdf]

clone X5 GGAATCTGTTGGAGGGCGGTGGTTCAGTCCCTCGGCCTGAGAGAGCTGGGCAGCGGGAGAC 60

clone X5 TCTGCCGGTGTGTCTGCTTGGACTCCGGGTGGAGAGGAGGCCGCTGAGGACTCGTGAGC 120

clone X5 AAGCCCTTGTCCCCAGGAAAGCCCGCAGGCCGGATGTCAGCCCCGGGAGTCAGGC'TGCC 180  
 TG'TCCCCAGGAAAGCCCGCAGGCCGGATGTCAGCCCCGGGAGTCAGGC'TGCC 53  
 \*\*\*\*\*

clone X5 GAGAGGCCGGGCGGGCCGGAGGGCCAGCTTAGCAGCGCTGTGCGGTCGACCAGAGAAGC 240  
 GAGAGGCCGGGCGGGCCGGAGGGCCAGCTTAGCAGCGCTGTGCGGTCGACCAGAGAAGC 113  
 \*\*\*\*\*

clone X5 CCTCCTGCTTCC'TTCTGCC'TGCGAACCCCGGCAGCTAATGACTTTC'TGTGGGATGGCAAG 300  
 CCTCCTGCTTCC'TTCTGCC'TGCGAACCCCGGCAGCTAATGACTTTC'TGTGGGATGGCAAG 173  
 \*\*\*\*\*

clone X5 ATGGTATGATTTGACAGATGAAAAAGTGAAGGCC'TATC'TTCTC'TCCACCC'TCAGG'TTTT 360  
 ATGGTATGATTTGACAGATGAAAAAGTGAAGGCC'TATC'TTCTC'TCCACCC'TCAGG'TTTT 233  
 \*\*\*\*\*

clone X5 AGATGAATTTGTGTCTGAAAGCGTTAGTGCAGAGACTGTAGAAAAATGGCTGAAGCGGAA 420  
 AGATGAATTTGTGTCTGAAAGCGTTAGTGCAGAGACTGTAGAAAAATGGCTGAAGCGGAA 293  
 \*\*\*\*\*

clone X5 AAACAAGAAGTCAGAAGATGAATCAGCTCC'TAAGGAAGTCAGCAGGTATCAAGATACAAA 480  
 AAACAAGAAGTCAGAAGATGAATCAGCTCC'TAAGGAAGTCAGCAGGTATCAAGATACAAA 353  
 \*\*\*\*\*

clone X5 TATGCAAGGAGTTGTGTATGAACTAAATAGCTATATAGAACAGCGGTTGGATACAGGAGG 540  
 TATGCAAGGAGTTGTGTATGAACTAAATAGCTATATAGAACAGCGGTTGGATACAGGAGG 413  
 \*\*\*\*\*

clone X5 AGACAACCAGCTACTCCTCTATGAACTGAGCAGCATCATCAAAATCGCCACAAAAGCTGA 600  
 AGACAACCAGCTACTCCTCTATGAACTGAGCAGCATCATCAAAATCGCCACAAAAGCTGA 473  
 \*\*\*\*\*

clone X5 CGGATTTGCAC'TGTATTTCC'TTGGAGAGTGCAATAACAGCC'TTGTGTGTTTATCCCGCC 660  
 CGGATTTGCAC'TGTATTTCC'TTGGAGAGTGCAATAACAGCC'TTGTGTGTTTATCCCGCC 533  
 \*\*\*\*\*

clone X5 TGGAAT 666  
 TGGAAT 539  
 \*\*\*\*\*
