# Supplementary material for: Identification and Localization of the Cyclic Nucleotide Phosphodiesterase 10A in Bovine Testis and Mature Spermatozoa
Source: PubMed Central journal article supplement (PMC4993467; doi:10.1371/journal.pone.0161035), 2016-08-22
Supplement: pone.0161035.s003.pdf [file pone.0161035.s003.pdf]

clone X5 CCCCAGCCCATGGCAGTTGGAATCTGTTGGAGGGCGGTTGGTCAGTCCTCGGCCTGAGAG 60

clone X5 AGCTGGGCAGCGGGAGACTCTGCCGGTGTGTCTGCTTGGACTCCGGGTGGAGAGGAGGCC 120

clone X5 GTCTGAGGACTCGTGAGCAAGCCCTTGTCCCCAGGAAAGCCCGCAGGCCGGATGTCAGCC 180  
TGTCCCCAGGAAAGCCCGCAGGCCGGATGTCAGCC 35

clone X5 CCGGGAGTCAGGCTGCCCGAGAGGCCGGGCGGGCCGGAGGGGCCAGCTTAGCAGCGCTGT 240  
CCGGGAGTCAGGCTGCCCGAGAGGCCGGGCGGGCCGGAGGGGCCAGCTTAGCAGCGCTGT 95  
\*\*\*\*\*

clone X5 GCGGTGACCCAGAGAAGCCCTCCTGCTTCCTTCTGCCTGCGAACCCCGGCAGCTAATGAC 300  
GCGGTGACCCAGAGAAGCCCTCCTGCTTCCTTCTGCCTGCGAACCCCGGCAGCTAATGAC 155  
\*\*\*\*\*

clone X5 TTTCTGTGGGATGGCAAGAT-----GATTTGACAGATGAAAAAGTGAAGGCCATATCTTTC 355  
TTTCTGTGGGATGGCAAGATGGTATGATTTGACAGATGAAAAAGTGAAGGCCATATCTTTC 215  
\*\*\*\*\*

clone X5 TCTCCACCCTCAGGTTTTAGATGAATTTGTGTCTGAAAGCGTTAGTGCAGAGACTGTAGA 415  
TCTCCACCCTCAGGTTTTAGATGAATTTGTGTCTGAAAGCGTTAGTGCAGAGACTGTAGA 275  
\*\*\*\*\*

clone X5 AAAATGGCTGAAGCGGAAAAACAAGAAGTCAGAAGATGAATCAGCTCCTAAGGAAGTCAG 475  
AAAATGGCTGAAGCGGAAAAACAAGAAGTCAGAAGATGAATCAGCTCCTAAGGAAGTCAG 335  
\*\*\*\*\*

clone X5 CAGGTATCAAGATACAAATATGCAAGGAGTTGTGTATGAACATAATAGCTATATAGAACA 535  
CAGGTATCAAGATACAAATATGCAAGGAGTTGTGTATGAACATAATAGCTATATAGAACA 395  
\*\*\*\*\*

clone X5 GCGGTTGGATACAGGAGGAGACAACCAGCTACTCCTCTATGAACAGCAGCATCATCAA 595  
GCGGTTGGATACAGGAGGAGACAACCAGCTACTCCTCTATGAACAGCAGCATCATCAA 455  
\*\*\*\*\*

clone X5 AATCGCCACAAAAGCTGACGGATTTGCACTGTATTTCCCTGGAGAGTGCAATAACAGCCT 655  
AATCGCCACAAAAGCTGACGGATTTGCACTGTATTTCCCTGGAGAGTGCAATAACAGCCT 515  
\*\*\*\*\*

clone X5 TTGTGTGTTTATCCCGCCTGGAAT 679  
TTGTGTGTTTATCCCGCCTGGAAT 539  
\*\*\*\*\*
