# Supplementary material for: Identification and Localization of the Cyclic Nucleotide Phosphodiesterase 10A in Bovine Testis and Mature Spermatozoa
Source: PubMed Central journal article supplement (PMC4993467; doi:10.1371/journal.pone.0161035), 2016-08-22
Supplement: pone.0161035.s004.pdf [file pone.0161035.s004.pdf]

```

clone      GTCCCCAGCCCATGGCAGTTGGAATCTGTTGGAGGGCGGTTGGTCAGTCCTCGGCCTGAG 60
X5         GTCCCCA----- 8
          *****

clone      AGAGCTGGGCAGCGGGAGACTCTGCCGGTGTGTCTGCTTGGACTCCGGGTGGAGAGGAGG 120
X5         -----

clone      CCGTCTGAGGACTCGTGAGCAAGCCCTTGTCCCCAGATTTGACAGATGAAAAAGTGAAGG 180
X5         -----GATTTGACAGATGAAAAAGTGAAGG 205
          *****

clone      CCTATCTTTCTCTCCACCCCTCAGGTTTTAGATGAATTTGTGTCTGAAAGCGTTAGTGCAG 240
X5         CCTATCTTTCTCTCCACCCCTCAGGTTTTAGATGAATTTGTGTCTGAAAGCGTTAGTGCAG 265
          *****

clone      AGACTGTAGAAAAATGGCTGAAGCGGAAAAACAAGAAGTCAGAAGATGAATCAGCTCCTA 300
X5         AGACTGTAGAAAAATGGCTGAAGCGGAAAAACAAGAAGTCAGAAGATGAATCAGCTCCTA 325
          *****

clone      AGGAAGTCAGCAGGTATCAAGATACAAATATGCAAGGAGTTGTGTATGAAC TAAATAGCT 360
X5         AGGAAGTCAGCAGGTATCAAGATACAAATATGCAAGGAGTTGTGTATGAAC TAAATAGCT 385
          *****

clone      ATATAGAACAGCGGTTGGATACAGGAGGAGACAACCAGCTACTCCTCTATGAACTGAGCA 420
X5         ATATAGAACAGCGGTTGGATACAGGAGGAGACAACCAGCTACTCCTCTATGAACTGAGCA 445
          *****

clone      GCATCATCAAAATCGCCACAAAAGCTGACGGATTTGCACTGTATTTCC TTGGAGAGTGCA 480
X5         GCATCATCAAAATCGCCACAAAAGCTGACGGATTTGCACTGTATTTCC TTGGAGAGTGCA 505
          *****

clone      ATAACAGCCTTTGTGTGTTTATCCCGCCTGGAAT 514
X5         ATAACAGCCTTTGTGTGTTTATCCCGCCTGGAAT 539
          *****

```
