# Supplementary material for: Identification and Localization of the Cyclic Nucleotide Phosphodiesterase 10A in Bovine Testis and Mature Spermatozoa
Source: PubMed Central journal article supplement (PMC4993467; doi:10.1371/journal.pone.0161035), 2016-08-22
Supplement: pone.0161035.s005.pdf [file pone.0161035.s005.pdf]

clone X5 AGTCTCGGCCCTGAGAGAGCTGGGCAGCGGGAGACTCTGCCGGTGTGTCTGCTTGGACTC 60  
-----

clone X5 CGGGTGGAGAGGAGGCCGTCTGAGGACTCGTGAGCAAGCCCTTGTCCCCAGGAAAGCCCG 120  
-----TGTCCCCAGGAAAGCCCG 18  
\*\*\*\*\*

clone X5 CAGGCCGGATGTCAGCCCCGGGAGTCAGGCTGCCCGAGAGGCCGGGCGGGCCGGAGGGGC 180  
CAGGCCGGATGTCAGCCCCGGGAGTCAGGCTGCCCGAGAGGCCGGGCGGGCCGGAGGGGC 78  
\*\*\*\*\*

clone X5 CAGCTTAGCAGCGCTGTGCGGTCGACCAGAGAAGCCCTCCTGCTTCCTTCTGCCCTGCGAA 240  
CAGCTTAGCAGCGCTGTGCGGTCGACCAGAGAAGCCCTCCTGCTTCCTTCTGCCCTGCGAA 138  
\*\*\*\*\*

clone X5 CCCCAGCAGCTAATGACTTTCCTGTGGGATGGCAAGAT-----GATTTGACAGATGAAAAA 295  
CCCCAGCAGCTAATGACTTTCCTGTGGGATGGCAAGATGGTATGATTTGACAGATGAAAAA 198  
\*\*\*\*\*

clone X5 GTGAAGGCCATATCTTTCCTCCACCCCTCAGGTTTTAGATGAATTTGTGTCTGAAAGCGTT 355  
GTGAAGGCCATATCTTTCCTCCACCCCTCAGGTTTTAGATGAATTTGTGTCTGAAAGCGTT 258  
\*\*\*\*\*

clone X5 AGTGCAGAGACTGTAGAAAAATGGCTGAAGCGGAAAAACAAGAAGTCAGAAGATGAATCA 415  
AGTGCAGAGACTGTAGAAAAATGGCTGAAGCGGAAAAACAAGAAGTCAGAAGATGAATCA 318  
\*\*\*\*\*

clone X5 GCTCCTAAGGAAGTCAGCAGGTATCAAGATACAAATATGCAAGGAGTTGTGTATGAACTA 475  
GCTCCTAAGGAAGTCAGCAGGTATCAAGATACAAATATGCAAGGAGTTGTGTATGAACTA 378  
\*\*\*\*\*

clone X5 AATAGCTATATAGAACAGCGGTTGGATACAGGAGGAGACAACCAGCTACTCCTCTATGAA 535  
AATAGCTATATAGAACAGCGGTTGGATACAGGAGGAGACAACCAGCTACTCCTCTATGAA 438  
\*\*\*\*\*

clone X5 CTGAGCAGCATCATCAAAATCGCCACAAAAGCTGACGGATTTGCACTGTATTTCCCTTGA 595  
CTGAGCAGCATCATCAAAATCGCCACAAAAGCTGACGGATTTGCACTGTATTTCCCTTGA 498  
\*\*\*\*\*

clone X5 GAGTGCAATAACGAGTGTCAAATTATCTAATCTGCCATATTGCTTGCAACAGATGTTGAC 655  
GAGTGCAATAAC----- 510  
\*\*\*\*\*

clone X5 ATACTTCTAAAATAGCCTTTGTGTGTTTATCCCGCCTGGAAT 697  
-----AGCCTTTGTGTGTTTATCCCGCCTGGAAT 539  
\*\*\*\*\*
